# Supplementary material for: Self-limiting lithiation of vanadium diboride nanosheets as ultra-stable mediators towards high-sulfur loading and long-cycle lithium sulfur batteries
Source: Royal Society of Chemistry journal article supplement (doi:10.1039/d1se00466b), 2021-01-01
Supplement: d1se00466b1.pdf [file d1se00466b1.pdf]

## **Self-limiting Lithiation of Vanadium Diboride Nanosheet as Ultra-stable Mediator Towards High-sulfur Loading and Long-cycle Lithium Sulfur Batteries**

Yuwei Zhao,<sup>a, +</sup> Hao Yin,<sup>a, +</sup> Zhe Zhang,<sup>b, c, +</sup> Chongguang Lyu,<sup>a</sup> Xuan Zhao,<sup>d</sup> Huakai Xu,<sup>b</sup> Gang Lu,<sup>a</sup> Tianshi Qin,<sup>a</sup> Gang Ouyang,<sup>b</sup> Chenyang Zha,<sup>a, e, \*</sup> Lin Wang<sup>a, \*</sup>

<sup>a</sup> Key Laboratory of Flexible Electronics (KLOFE), Institute of Advanced Materials (IAM), Nanjing Tech University, Nanjing 211816, China

<sup>b</sup> Key Laboratory of Low-Dimensional Quantum Structures and Quantum Control of Ministry of Education, Key Laboratory for Matter Microstructure and Function of Hunan Province, Hunan Normal University, Changsha 410081, China

<sup>c</sup> College of Science, Henan University of Technology, Zhengzhou 450001, China

<sup>d</sup> Institute of Functional Nano & Soft Materials (FUNSOM), Soochow University, Suzhou, 215123, China

<sup>e</sup> Joint Key Laboratory of the Ministry of Education, Institute of Applied Physics and Materials Engineering (IAPME), University of Macau, Avenida da Universidade, Taipa, Macau SAR, 999078, China

<sup>+</sup> These authors contributed equally to this article.

Corresponding authors:

iamcyzha@njtech.edu.cn (C. Zha)

chenyangzha@um.edu.mo (C. Zha)

iamlwang@njtech.edu.cn (L. Wang)

**Table S1.** Electrochemical performance of the VB<sub>2</sub>-based Li<sub>2</sub>S<sub>6</sub> cell and other similar cathode materials reported in literature.

| Polysulfide host                                | Sulfur loading<br>(mg cm <sup>-2</sup> ) | Specific capacities<br>(mAh g <sup>-1</sup> ) | Cycling stability<br>(mAh g <sup>-1</sup> ) | Reference                                                            |
|-------------------------------------------------|------------------------------------------|-----------------------------------------------|---------------------------------------------|----------------------------------------------------------------------|
| Li <sub>2</sub> S <sub>6</sub> -VB <sub>2</sub> | 2.0 mg cm <sup>-2</sup>                  | 1280 at 0.5 C                                 | 590 after 1000 cycles                       | <b>This work</b>                                                     |
|                                                 | 2.0 mg cm <sup>-2</sup>                  | 1210 at 1 C                                   | 470 after 1000 cycles                       |                                                                      |
|                                                 | 2.0 mg cm <sup>-2</sup>                  | 980 at 2 C                                    | 340 after 1000 cycles                       |                                                                      |
|                                                 | 4.0 mg cm <sup>-2</sup>                  | 624 at 1 C                                    | 452 after 500 cycles                        |                                                                      |
| V <sub>2</sub> O <sub>5</sub> -CNF              | 2.0 mg cm <sup>-2</sup>                  | 816 at 3 C                                    | 576 after 1000 cycles                       | <i>Small.</i><br>2017, 1602539                                       |
| VN-NBs                                          | 1.2 mg cm <sup>-2</sup>                  | 1100 at 1 C                                   | 837 after 1000 cycles                       | <i>Nano Lett.</i><br>2017, 17, 7839-<br>7846                         |
|                                                 | 1.2 mg cm <sup>-2</sup>                  | 960 at 2 C                                    | 704 after 1000 cycles                       |                                                                      |
|                                                 | 3.3 mg cm <sup>-2</sup>                  | 1143 at 0.5 C                                 | 951 after 200 cycles                        |                                                                      |
|                                                 | 5.4 mg cm <sup>-2</sup>                  | 1075 at 0.5 C                                 | 799 after 200 cycles                        |                                                                      |
|                                                 | 6.8 mg cm <sup>-2</sup>                  | 797 at 0.5 C                                  | 563 after 200 cycles                        |                                                                      |
| MoN-VN                                          | Not given                                | 766 at 1 C                                    | 555 after 500 cycles                        | <i>Angew. Chem.</i><br><i>Int. Ed.</i><br>2018, 57, 16703<br>-16707. |
|                                                 | 3.0 mg cm <sup>-2</sup>                  | 708 at 2 C                                    | 467 after 500 cycles                        |                                                                      |
| PCF/VN                                          | 8.1 mg cm <sup>-2</sup>                  | 1310.8 at 0.1 C                               | 1052.5 after 250 cycles                     | <i>Adv. Funct.</i><br><i>Mater.</i><br>2018, 1706391                 |
| VO <sub>2</sub> @rGO                            | 1.5 mg cm <sup>-2</sup>                  | 1358 at 0.2 C                                 | 1049 after 370 cycles                       | <i>J. Mater. Chem.</i><br><i>A</i> ,<br>2019,7, 1658-<br>1668        |
|                                                 | 1.5 mg cm <sup>-2</sup>                  | 1071 at 1 C                                   | 751 after 200 cycles                        |                                                                      |
|                                                 | 4.0 mg cm <sup>-2</sup>                  | 711 at 0.5 C                                  | 685 after 20 cycles                         |                                                                      |
| VO <sub>2</sub> HSs                             | 0.942 mg                                 | 930 at 0.1 C                                  | 789 after 80 cycles                         | <i>J. Mater. Chem.</i><br><i>A</i> ,<br>2019,7, 3618-<br>3623        |
|                                                 | 0.942 mg                                 | 576 at 1 C                                    | 440 after 200 cycles                        |                                                                      |
| rGO-VS <sub>2</sub> /(S-64)                     | 1.15 mg cm <sup>-2</sup>                 | 1194 at 0.2 C                                 | 929 after 200 cycles                        | <i>Adv. Energy</i><br><i>Mater.</i><br>2017, 1702337                 |
|                                                 | 1.15 mg cm <sup>-2</sup>                 | 1027 at 1 C                                   | 879 after 1200 cycles                       |                                                                      |
|                                                 | 1.15 mg cm <sup>-2</sup>                 | 832 at 2 C                                    | 662 after 1200 cycles                       |                                                                      |
| G-VS <sub>2</sub>                               | 1.0 mg cm <sup>-2</sup>                  | 1270 at 1 C                                   | 923 after 150 cycles                        | <i>Adv. Energy</i><br><i>Mater.</i><br>2018, 1800201                 |
|                                                 | 1.0 mg cm <sup>-2</sup>                  | 1185 at 2 C                                   | 990 after 100 cycles                        |                                                                      |
|                                                 | 2.0 mg cm <sup>-2</sup>                  | 786 at 1 C                                    | 559 after 150 cycles                        |                                                                      |
|                                                 | 3.5 mg cm <sup>-2</sup>                  | 701 at 1 C                                    | 520 after 150 cycles                        |                                                                      |
| VS <sub>4</sub> @RGO                            | 3.0 mg cm <sup>-2</sup>                  | 937 at 1 C                                    | 601 after 500 cycles                        | <i>ACS Energy</i><br><i>Lett.</i><br>2020, 5, 4,<br>1177-1185        |
|                                                 | 5.0 mg cm <sup>-2</sup>                  | 1116 at 0.2 C                                 | 996 after 100 cycles                        |                                                                      |
|                                                 | 7.0 mg cm <sup>-2</sup>                  | 1030 at 0.2 C                                 | 853 after 100 cycles                        |                                                                      |
|                                                 | 10.0 mg cm <sup>-2</sup>                 | 834 at 0.2 C                                  | 705 after 100 cycles                        |                                                                      |

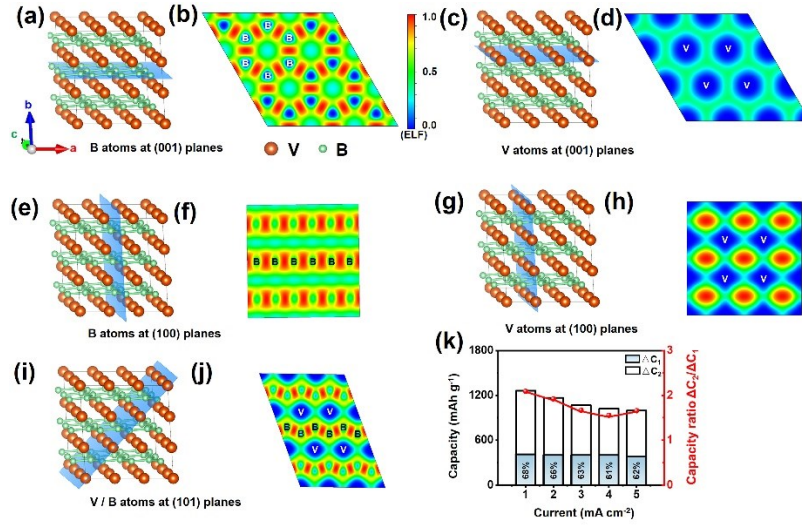

**Fig. S1.** Crystal structure and electron location function of  $\text{VB}_2$  with B atoms at (001) planes (a-b), V atoms at (001) planes (c-d), B atoms at (100) planes (e-f), V atoms at (100) planes (g-h), and V and B atoms at (101) planes (i-j), respectively. The corresponding ratios (k) of  $\Delta C_2 / \Delta C_1$  from 1 to 5 mA cm<sup>-2</sup>

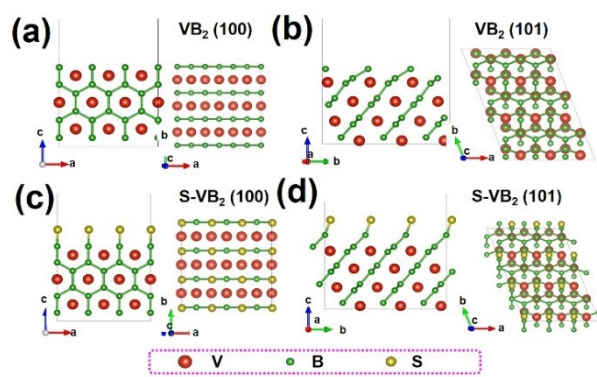

**Fig. S2.** Top and side views of the  $\text{VB}_2$  (100) facets (a), and (101) facets (b), respectively. Top and side views of the passivated  $\text{VB}_2$  (100) facets with sulfur atoms (c), and (101) facets with sulfur atoms (d), respectively.

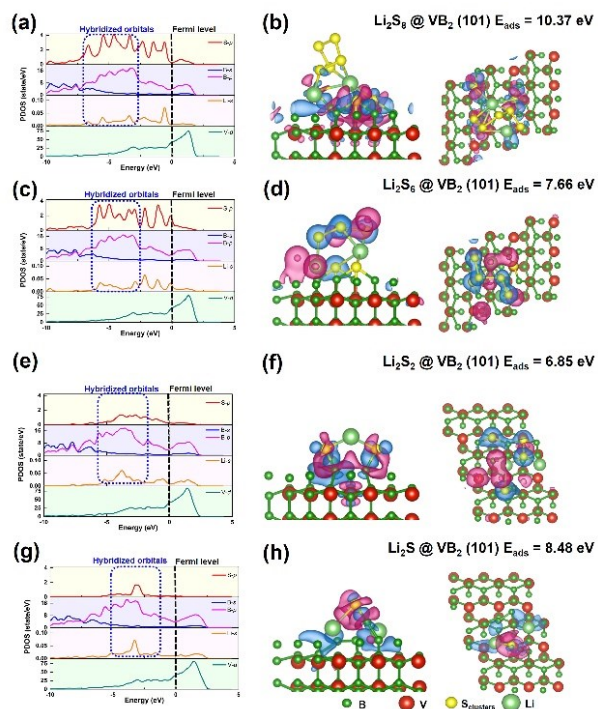

**Fig. S3.** Density functional theory calculations of the PDOS, side and top views of charge density difference of  $\text{Li}_2\text{S}_8$  (a, b),  $\text{Li}_2\text{S}_6$  (c, d),  $\text{Li}_2\text{S}_2$  (e, f) and  $\text{Li}_2\text{S}$  (g, h) molecules adsorbed on the pure  $\text{VB}_2$  (101) facets. The blue and pink areas are the regions of trapped and lost charge.

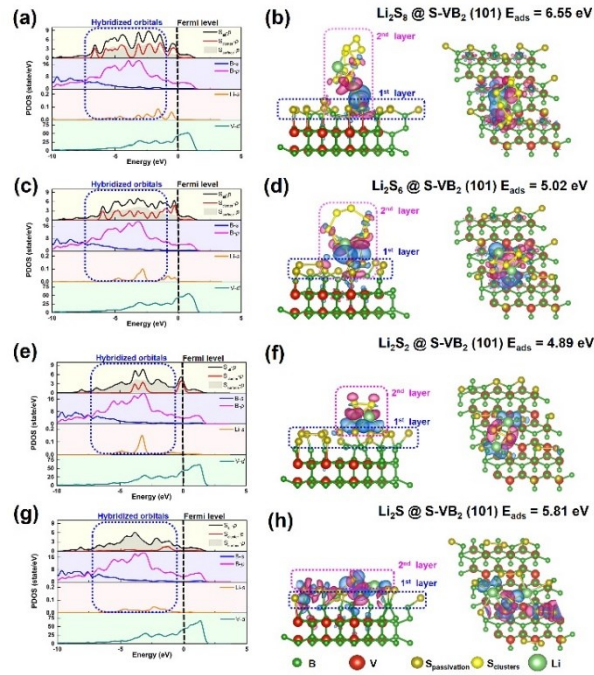

**Fig. S4.** Density functional theory calculations of the PDOS, side and top views of charge density difference of  $\text{Li}_2\text{S}_8$  (a, b),  $\text{Li}_2\text{S}_6$  (c, d),  $\text{Li}_2\text{S}_2$  (e, f) and  $\text{Li}_2\text{S}$  (g, h) molecules adsorbed on the passivated  $\text{VB}_2$  (101) facets. The blue and pink areas are the regions of trapped and lost charge.

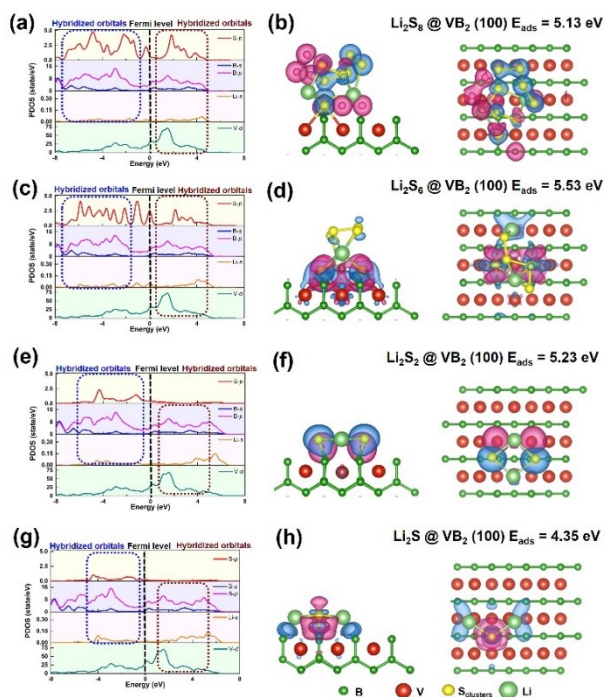

**Fig. S5.** Density functional theory calculations of the PDOS, side and top views of charge density difference of  $\text{Li}_2\text{S}_8$  (a, b),  $\text{Li}_2\text{S}_6$  (c, d),  $\text{Li}_2\text{S}_2$  (e, f) and  $\text{Li}_2\text{S}$  (g, h) molecules adsorbed on the pure  $\text{VB}_2$  (100) facets. The blue and pink areas are the regions of trapped and lost charge.

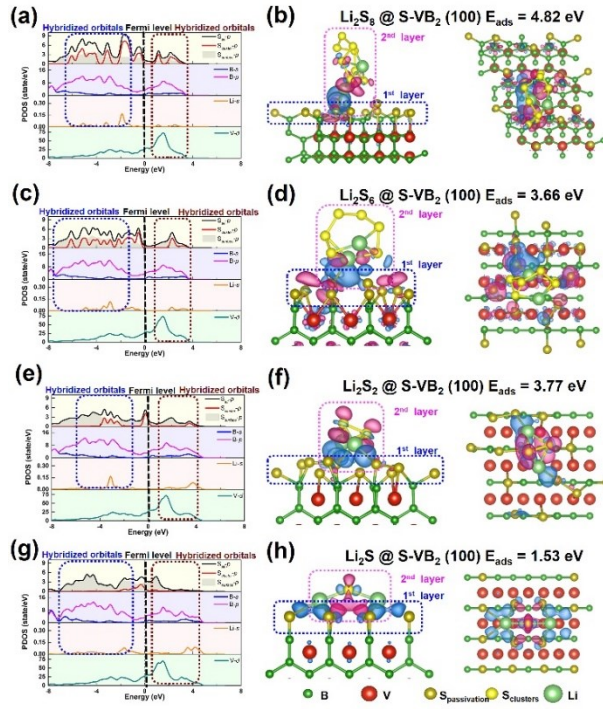

**Fig. S6.** Density functional theory calculations of the PDOS, side and top views of charge density difference of  $\text{Li}_2\text{S}_8$  (a, b),  $\text{Li}_2\text{S}_6$  (c, d),  $\text{Li}_2\text{S}_2$  (e, f) and  $\text{Li}_2\text{S}$  (g, h) molecules adsorbed on the passivated  $\text{VB}_2$  (100) facets. The blue and pink areas are the regions of trapped and lost charge.
